# Supplementary material for: Genetically defined elevated homocysteine levels do not result in widespread changes of DNA methylation in leukocytes
Source: PubMed Central journal article supplement (PMC5662081; doi:10.1371/journal.pone.0182472), 2017-10-30
Supplement: pone.0182472.s002.pdf [file pone.0182472.s002.pdf]

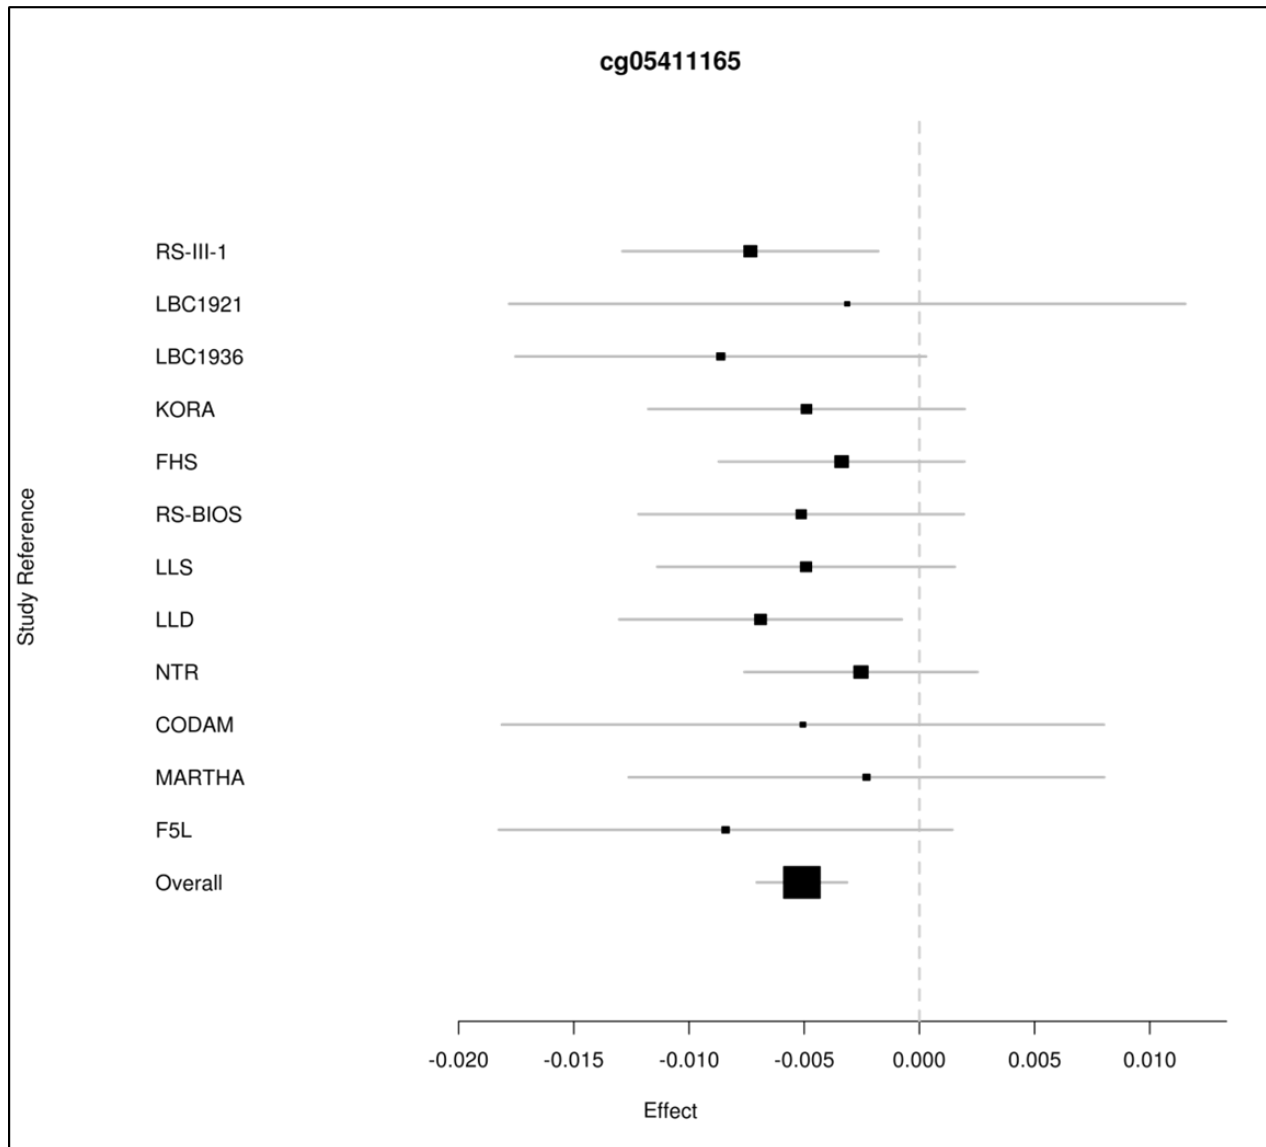

**S2 Fig. Forest plot.** *Trans*-meQTL of the MTHFR 677C>T model across 12 cohorts.
