# Supplementary material for: Genetically defined elevated homocysteine levels do not result in widespread changes of DNA methylation in leukocytes
Source: PubMed Central journal article supplement (PMC5662081; doi:10.1371/journal.pone.0182472), 2017-10-30
Supplement: pone.0182472.s003.pdf [file pone.0182472.s003.pdf]

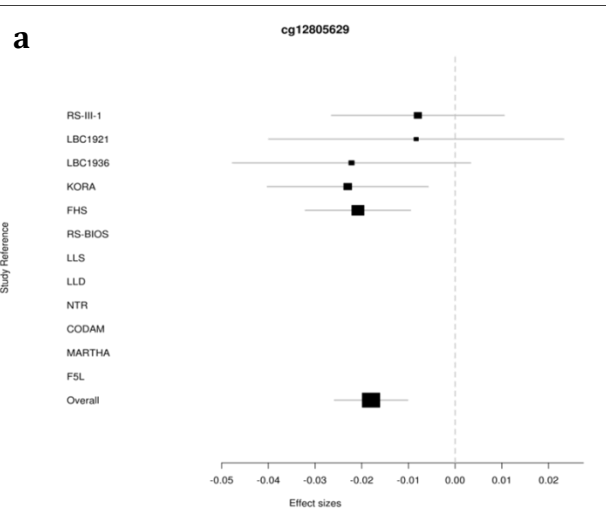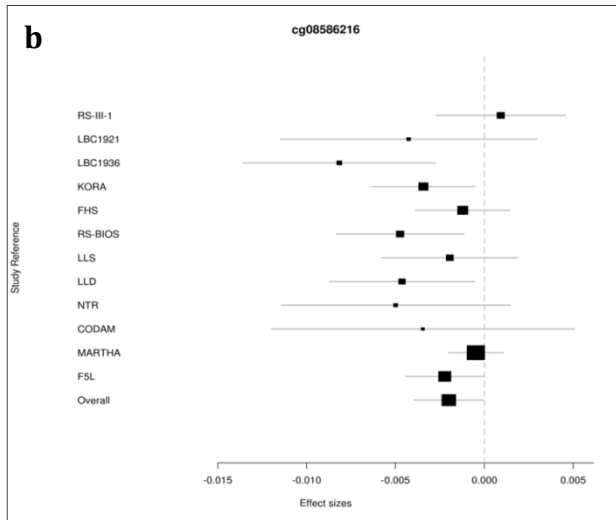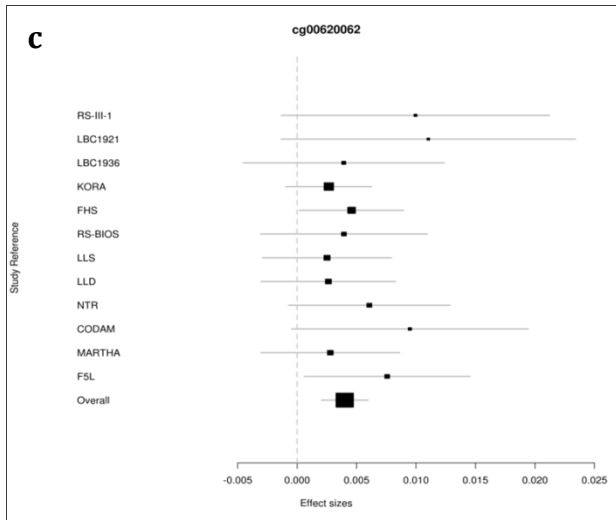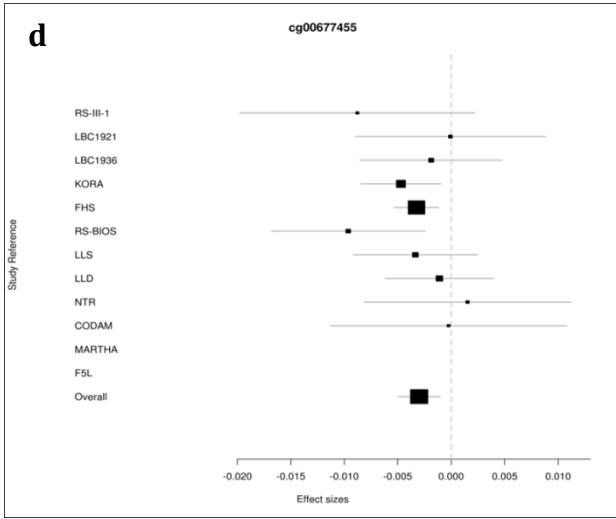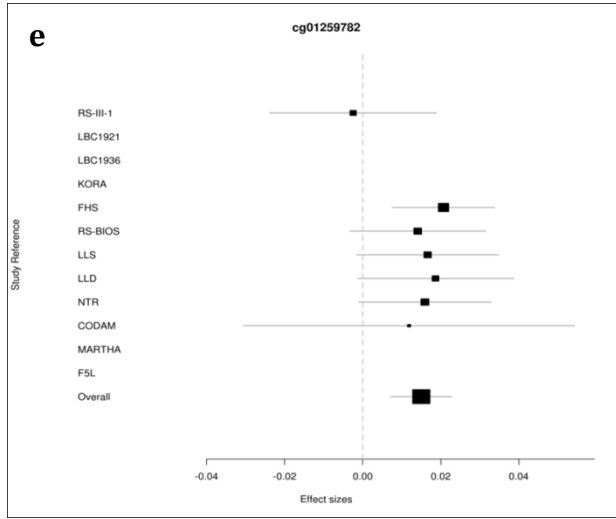

**S3 (a-e) Figs. Forest plots. *Trans*-meQTLs of the Genetic risk score model across 12 cohorts.**
