# Supplementary material for: Genetically defined elevated homocysteine levels do not result in widespread changes of DNA methylation in leukocytes
Source: PubMed Central journal article supplement (PMC5662081; doi:10.1371/journal.pone.0182472), 2017-10-30
Supplement: pone.0182472.s004.pdf [file pone.0182472.s004.pdf]

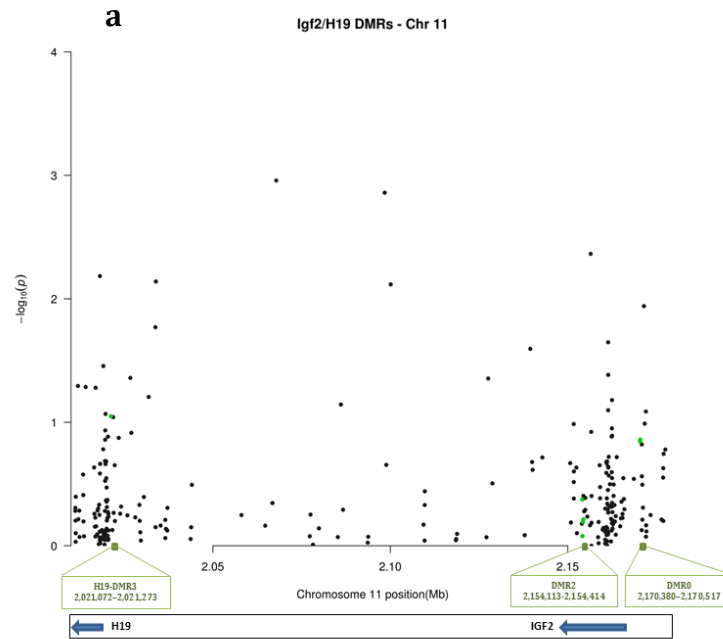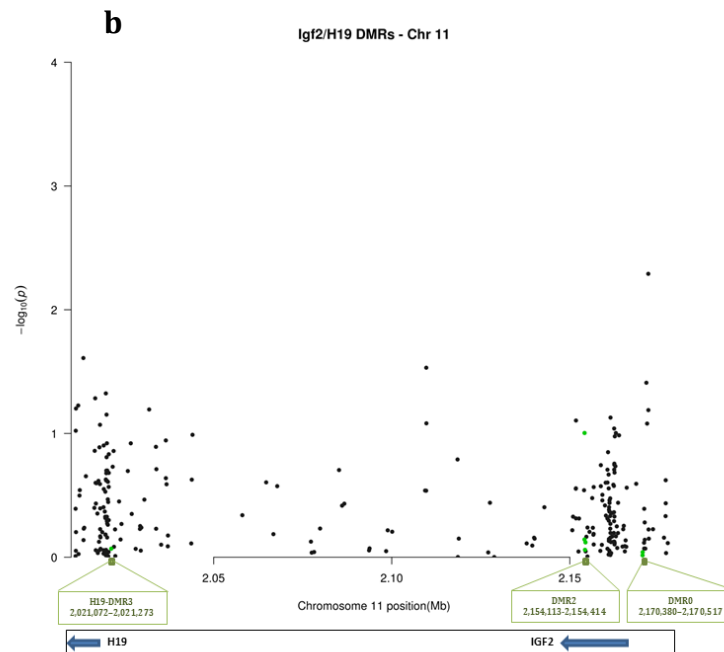

**S4 (a and b) Figs. Regional manhattan plots.** (a) MTHFR 677 C>T variant or (b) Genetic risk score associated 3 DMRs of IGF2/H19 genes containing 7 CpGs (green) from the 450k data; DMR0 “Chr.11:2,170,380-2,170,517” with 2 CpGs, DMR2 “Chr.11:2,154,113-2,154,414” with 4 CpGs and H19-DMR3 “Chr.11:2,021,072-2,021,273” with 1 CpG.
