# Supplementary material for: Genetically defined elevated homocysteine levels do not result in widespread changes of DNA methylation in leukocytes
Source: PubMed Central journal article supplement (PMC5662081; doi:10.1371/journal.pone.0182472), 2017-10-30
Supplement: pone.0182472.s010.pdf [file pone.0182472.s010.pdf]

**S6a Table. 14 *trans*-meQTLs of chromosome 6 with FDR<0.05 that are associated with Genetic Risk Score of 18 Hcy-associated variants in a sample size of 9,894, and were 1Mb-5Mb away from the SNP rs548987 of SLC17A3 gene. The CpGs are sorted in base pairs.**

| Rank | CpG        | Sample Size | Effect | StdErr | Pvalue   | FDR      | HetISq | HetPVal  | Genes Associated                      | Chr | Bp       | Enhancer | Promoter |
|------|------------|-------------|--------|--------|----------|----------|--------|----------|---------------------------------------|-----|----------|----------|----------|
| 7    | cg18278486 | 9,894       | -0.021 | 0.004  | 8.58E-08 | 5.06E-04 | 51.2   | 2.05E-02 | ZNF322 (-327572), HIST1H2BJ (+113023) | 6   | 26987575 | -        | -        |
| 10   | cg10547057 | 9,894       | -0.010 | 0.002  | 4.57E-07 | 2.29E-03 | 59.4   | 4.47E-03 | ZNF322 (-327855), HIST1H2BJ (+112740) | 6   | 26987810 | -        | -        |
| 12   | cg00903577 | 9,894       | -0.022 | 0.005  | 5.51E-07 | 2.65E-03 | 25.2   | 1.96E-01 | SCAND3 (-276022), TRIM27 (+60634)     | 6   | 28831109 | -        | TRUE     |
| 29   | cg03270340 | 8,095       | -0.004 | 0.001  | 1.44E-05 | 4.76E-02 | 45     | 5.17E-02 | TRIM27 (+587)                         | 6   | 28891204 | -        | TRUE     |
| 23   | cg11747594 | 9,894       | -0.040 | 0.009  | 8.52E-06 | 3.03E-02 | 32.7   | 1.29E-01 | ZFP57 (-3319)                         | 6   | 29648225 | -        | -        |
| 25   | cg07134666 | 9,894       | -0.051 | 0.012  | 1.31E-05 | 4.49E-02 | 9.7    | 3.50E-01 | ZFP57 (-3494)                         | 6   | 29648400 | -        | -        |
| 21   | cg16885113 | 9,894       | -0.043 | 0.010  | 7.30E-06 | 2.66E-02 | 13.1   | 3.16E-01 | ZFP57 (-3601)                         | 6   | 29648507 | -        | -        |
| 28   | cg20228636 | 9,894       | -0.044 | 0.010  | 1.43E-05 | 4.76E-02 | 16.2   | 2.85E-01 | ZFP57 (-3619)                         | 6   | 29648525 | -        | -        |
| 27   | cg11383134 | 9,894       | -0.045 | 0.010  | 1.41E-05 | 4.72E-02 | 9.4    | 3.53E-01 | ZFP57 (-3684)                         | 6   | 29648590 | -        | -        |
| 15   | cg13643180 | 9,894       | 0.013  | 0.003  | 1.69E-06 | 7.22E-03 | 2      | 4.24E-01 | HLA-G (-33443), LOC554223 (+1630)     | 6   | 29761288 | -        | TRUE     |
| 11   | cg15411272 | 9,894       | 0.051  | 0.010  | 5.15E-07 | 2.52E-03 | 9.3    | 3.54E-01 | HLA-A (-15083), HLA-G (+100408)       | 6   | 29895187 | -        | TRUE     |
| 8    | cg26121931 | 9,894       | 0.056  | 0.011  | 2.07E-07 | 1.11E-03 | 17.7   | 2.70E-01 | HLA-A (-15066), HLA-G (+100425)       | 6   | 29895204 | -        | TRUE     |
| 16   | cg04628742 | 9,334       | -0.017 | 0.004  | 2.36E-06 | 9.73E-03 | 0      | 7.43E-01 | HLA-J (-971)                          | 6   | 29973221 | -        | -        |
| 20   | cg13196879 | 9,894       | 0.010  | 0.002  | 6.78E-06 | 2.49E-02 | 34.9   | 1.11E-01 | RNF39 (-27824), TRIM31 (+9415)        | 6   | 30071427 | -        | -        |

Effect: Regression coefficients

FDR: False discovery Rate adjusted P-value, threshold = 0.05

HetISq: Heterogeneity I<sup>2</sup> parameter

HetPVal: Heterogeneity p-value

Enhancer & promoter annotations from illumina 450k annotation

**S6b Table. Conditional analysis for the 14 *trans*-meQTLs of chromosome 6 with adjustment for the SNP rs548987 of SLC17A3 gene in a subset of 3,786. The CpGs are sorted in base pairs.**

| Rank | CpG        | Sample Size | Unconditional analysis (N=3,786) |        |          |            | Conditional analysis (N=3,786) adjusted for rs548987 at chr 6 |        |          |            |
|------|------------|-------------|----------------------------------|--------|----------|------------|---------------------------------------------------------------|--------|----------|------------|
|      |            |             | Effect                           | StdErr | Pvalue   | Bonferroni | Effect                                                        | StdErr | Pvalue   | Bonferroni |
| 7    | cg18278486 | 3,786       | -0.022                           | 0.006  | 1.33E-04 | Yes        | -0.006                                                        | 0.006  | 2.89E-01 | No         |
| 10   | cg10547057 | 3,786       | -0.014                           | 0.003  | 1.56E-05 | Yes        | -0.005                                                        | 0.003  | 8.80E-02 | No         |
| 12   | cg00903577 | 3,786       | -0.025                           | 0.006  | 8.70E-05 | Yes        | -0.002                                                        | 0.006  | 7.94E-01 | No         |
| 29   | cg03270340 | 3,786       | -0.005                           | 0.001  | 2.05E-04 | Yes        | -0.002                                                        | 0.001  | 1.82E-01 | No         |
| 23   | cg11747594 | 3,786       | -0.029                           | 0.013  | 2.48E-02 | No         | 0.003                                                         | 0.014  | 8.33E-01 | No         |
| 25   | cg07134666 | 3,786       | -0.041                           | 0.019  | 2.57E-02 | No         | 0.013                                                         | 0.016  | 4.12E-01 | No         |
| 21   | cg16885113 | 3,786       | -0.032                           | 0.015  | 2.78E-02 | No         | 0.007                                                         | 0.015  | 6.43E-01 | No         |
| 28   | cg20228636 | 3,786       | -0.035                           | 0.015  | 1.88E-02 | No         | 0.004                                                         | 0.015  | 8.17E-01 | No         |
| 27   | cg11383134 | 3,786       | -0.035                           | 0.016  | 3.21E-02 | No         | 0.014                                                         | 0.014  | 3.34E-01 | No         |
| 15   | cg13643180 | 3,786       | 0.010                            | 0.004  | 1.12E-02 | No         | 0.007                                                         | 0.004  | 5.48E-02 | No         |
| 11   | cg15411272 | 3,786       | 0.041                            | 0.015  | 7.13E-03 | No         | -0.007                                                        | 0.014  | 5.92E-01 | No         |
| 8    | cg26121931 | 3,786       | 0.050                            | 0.016  | 2.26E-03 | No         | 0.000                                                         | 0.016  | 9.82E-01 | No         |
| 16   | cg04628742 | 3,786       | -0.019                           | 0.006  | 9.40E-04 | Yes        | -0.005                                                        | 0.006  | 3.72E-01 | No         |
| 20   | cg13196879 | 3,786       | 0.012                            | 0.004  | 1.61E-03 | No         | 0.002                                                         | 0.003  | 5.88E-01 | No         |

Effect: Regression coefficients

Bonferroni threshold = 3.57E-03
