# Supplementary material for: Genetically defined elevated homocysteine levels do not result in widespread changes of DNA methylation in leukocytes
Source: PubMed Central journal article supplement (PMC5662081; doi:10.1371/journal.pone.0182472), 2017-10-30
Supplement: pone.0182472.s011.pdf [file pone.0182472.s011.pdf]

**S7a Table. 7 genome-wide *trans*-meQTLs with FDR<0.05 that are associated with Genetic Risk Score of 18 Hcy-associated variants in a sample size of 9,894 and were a direct *trans*-meQTL of either SNP rs548987 of SLC17A3 gene or rs154657 SNP of DPEP1 gene.**

| Rank | CpG        | Sample Size | Direct <i>trans</i> -meQTL of: | Effect | StdErr | Pvalue   | FDR      | HetISq | HetPVal  | Genes Associated                  | Chr | Bp        | Enhancer | Promoter |
|------|------------|-------------|--------------------------------|--------|--------|----------|----------|--------|----------|-----------------------------------|-----|-----------|----------|----------|
| 19   | cg01620082 | 9,894       | rs548987                       | -0.017 | 0.004  | 6.03E-06 | 2.28E-02 | 20.5   | 2.43E-01 | ALG1L (-22545), ROPN1B (-9596)    | 3   | 125678407 | -        | -        |
| 13   | cg06606381 | 9,894       | rs548987                       | -0.021 | 0.004  | 6.45E-07 | 3.07E-03 | 30.1   | 1.51E-01 | GALNT9 (-179017), P2RX2 (-110481) | 12  | 133084897 | -        | -        |
| 14   | cg17862947 | 9,334       | rs548987                       | -0.014 | 0.003  | 7.56E-07 | 3.52E-03 | 47.8   | 4.48E-02 | GALNT9 (-181046), P2RX2 (-108452) | 12  | 133086926 | -        | -        |
| 2    | cg24644049 | 9,894       | rs154657                       | -0.016 | 0.002  | 2.24E-20 | 3.73E-16 | 69.3   | 1.77E-04 | CDS1 (-32)                        | 4   | 85504048  | -        | -        |
| 3    | cg03958163 | 9,894       | rs154657                       | -0.010 | 0.001  | 7.95E-17 | 1.03E-12 | 86.3   | 1.20E-12 | SH3PXD2A (-315)                   | 10  | 105615502 | -        | -        |
| 22   | cg21963436 | 9,894       | rs154657                       | 0.004  | 0.001  | 7.65E-06 | 2.76E-02 | 57.9   | 6.16E-03 | CDX2 (+2150), PDX1 (+46999)       | 13  | 28541142  | -        | -        |
| 9    | cg03253314 | 9,894       | rs154657                       | -0.003 | 0.001  | 2.29E-07 | 1.21E-03 | 0      | 6.37E-01 | GTPBP3 (-2590), ANO8 (-98)        | 19  | 17445711  | -        | TRUE     |

Effect: Regression coefficients

FDR: False discovery Rate adjusted P-value, threshold = 0.05

HetISq: Heterogeneity I<sup>2</sup> parameter

HetPVal: Heterogeneity p-value

Enhancer & promoter annotations from Illumina 450k annotation

**S7b Table: Conditional analysis for the 7 genome-wide *trans*-meQTLs with adjustment for their respective SNP rs548987 of SLC17A3 gene at chromosome 6 or rs154657 SNP of DPEP1 gene at chromosomes 16 in a subset of 3,786.**

| Rank | CpG        | Sample Size | Direct <i>trans</i> -meQTL of: | Unconditional analysis (N=3,786) |        |          |            | Conditional analysis (N=3,786) adjusted for rs548987 at chr6 |        |          |            | Conditional Analysis (N=3,786) adjusted for rs154657 at chr16 |        |          |            |
|------|------------|-------------|--------------------------------|----------------------------------|--------|----------|------------|--------------------------------------------------------------|--------|----------|------------|---------------------------------------------------------------|--------|----------|------------|
|      |            |             |                                | Effect                           | StdErr | P-value  | Bonferroni | Effect                                                       | StdErr | P-value  | Bonferroni | Effect                                                        | StdErr | P-value  | Bonferroni |
| 19   | cg01620082 | 3,786       | rs548987                       | -0.012                           | 0.006  | 3.86E-02 | No         | 0.0083                                                       | 0.0056 | 1.37E-01 | No         | -                                                             | -      | -        | -          |
| 13   | cg06606381 | 3,786       | rs548987                       | -0.016                           | 0.007  | 1.84E-02 | No         | 0.0075                                                       | 0.0063 | 2.33E-01 | No         | -                                                             | -      | -        | -          |
| 14   | cg17862947 | 3,786       | rs548987                       | -0.013                           | 0.004  | 4.02E-03 | Yes        | 0.0012                                                       | 0.0042 | 7.70E-01 | No         | -                                                             | -      | -        | -          |
| 2    | cg24644049 | 3,786       | rs154657                       | -0.016                           | 0.003  | 5.21E-08 | Yes        | -                                                            | -      | -        | -          | -0.0049                                                       | 0.0031 | 1.10E-01 | No         |
| 3    | cg03958163 | 3,786       | rs154657                       | -0.016                           | 0.003  | 1.08E-10 | Yes        | -                                                            | -      | -        | -          | 0.0004                                                        | 0.0024 | 8.62E-01 | No         |
| 22   | cg21963436 | 3,786       | rs154657                       | 0.002                            | 0.001  | 1.82E-01 | No         | -                                                            | -      | -        | -          | 0.0007                                                        | 0.0015 | 6.47E-01 | No         |
| 9    | cg03253314 | 3,786       | rs154657                       | -0.003                           | 0.001  | 2.21E-03 | Yes        | -                                                            | -      | -        | -          | -0.0008                                                       | 0.0011 | 4.69E-01 | No         |

Effect: Regression coefficients

Bonferroni threshold = 7.14E-03
