# Supplementary material for: Genetically defined elevated homocysteine levels do not result in widespread changes of DNA methylation in leukocytes
Source: PubMed Central journal article supplement (PMC5662081; doi:10.1371/journal.pone.0182472), 2017-10-30
Supplement: pone.0182472.s012.pdf [file pone.0182472.s012.pdf]

**S8 Table: 9 genome-wide *trans*-meQTLs with FDR<0.05 that are associated with Genetic Risk Score of 18 Hcy-associated variants in a sample size of 9,894.** The CpGs are sorted in chromosomes and base pairs.

| Rank | CpG        | Sample Size | Effect | StdErr | Pvalue   | FDR      | HetISq | HetPVal  | Genes Associated                | Chr | Bp        | Enhancer | Promoter |
|------|------------|-------------|--------|--------|----------|----------|--------|----------|---------------------------------|-----|-----------|----------|----------|
| 5    | cg21302420 | 6,837       | -0.006 | 0.001  | 3.98E-12 | 3.56E-08 | 64.4   | 9.77E-03 | RAP1A                           | 1   | 112162376 | -        | TRUE     |
| 6    | cg20159777 | 9,334       | -0.005 | 0.001  | 6.21E-11 | 5.16E-07 | 66.6   | 1.42E-03 | BTG2 (+21911), FMOD (+23714)    | 1   | 203296550 | -        | TRUE     |
| 18   | cg12805629 | 6,277       | -0.018 | 0.004  | 3.15E-06 | 1.23E-02 | 0      | 7.09E-01 | MRPL55 (+6698), ARF1 (+19954)   | 2   | 11565653  | -        | -        |
| 30   | cg08586216 | 9,894       | -0.002 | 0.001  | 1.49E-05 | 4.89E-02 | 37.6   | 9.09E-02 | TULP1 (-131681), FKBP5 (+44391) | 6   | 35612351  | TRUE     | -        |
| 4    | cg03920392 | 6,837       | -0.009 | 0.001  | 8.83E-14 | 8.75E-10 | 61.9   | 1.51E-02 | ZNF395                          | 8   | 28243022  | -        | -        |
| 17   | cg00620062 | 9,894       | 0.004  | 0.001  | 2.83E-06 | 1.12E-02 | 0      | 8.69E-01 | PTF1A (+6292)                   | 10  | 23487775  | -        | -        |
| 24   | cg00677455 | 9,334       | -0.003 | 0.001  | 8.76E-06 | 3.09E-02 | 0      | 6.21E-01 | CTDSP2 (-269)                   | 12  | 58241039  | -        | TRUE     |
| 1    | cg13698153 | 9,733       | -0.012 | 0.001  | 5.97E-54 | 5.56E-49 | 90.8   | 1.05E-18 | VSIG10 (+63)                    | 12  | 118541722 | -        | -        |
| 26   | cg01259782 | 6,194       | 0.015  | 0.004  | 1.33E-05 | 4.52E-02 | 0      | 7.43E-01 | CRYM (+454)                     | 16  | 21313973  | -        | -        |

Effect: Regression coefficients

FDR: False discovery Rate adjusted P-value, threshold = 0.05

HetISq: Heterogeneity I<sup>2</sup> parameter

HetPVal: Heterogeneity p-value

Enhancer & promoter annotations from Illumina 450k annotation
