# Supplementary material for: Genetically defined elevated homocysteine levels do not result in widespread changes of DNA methylation in leukocytes
Source: PubMed Central journal article supplement (PMC5662081; doi:10.1371/journal.pone.0182472), 2017-10-30
Supplement: pone.0182472.s013.pdf [file pone.0182472.s013.pdf]

**S9a Table. MTHFR 677C>T variant associated DMPs at the 3 IGF2/H19 DMR regions at chromosome 11.**

| DMR      | CpG        | N            | Effect  | StdErr | Pvalue | Bonferroni | HetISq | Bp      |
|----------|------------|--------------|---------|--------|--------|------------|--------|---------|
| H19-DMR3 | cg22259242 | +++++----??  | 0.0006  | 0.0003 | 0.089  | No         | 43.4   | 2021243 |
| DMR2     | cg13165070 | ?????+--?+++ | 0.0009  | 0.0011 | 0.421  | No         | 10.4   | 2154113 |
| DMR2     | cg11717189 | ?????---?+++ | -0.0003 | 0.0016 | 0.835  | No         | 0      | 2154132 |
| DMR2     | cg07096953 | -+++--+++++  | 0.0004  | 0.0009 | 0.643  | No         | 0      | 2154255 |
| DMR2     | cg02613624 | -++++-----+  | 0.0003  | 0.0006 | 0.611  | No         | 21.6   | 2154386 |
| DMR0     | cg00273464 | +++++-----   | 0.0012  | 0.0008 | 0.143  | No         | 0      | 2170412 |
| DMR0     | cg17665927 | +++++-----   | 0.0014  | 0.0009 | 0.138  | No         | 0      | 2170443 |

Effect: Regression coefficients

Bonferroni threshold = 7.14E-03

HetISq: Heterogeneity I<sup>2</sup> parameter

Enhancer & promoter annotations from Illumina 450k annotation

**S9b Table. GRS associated DMPs at the 3 IGF2/H19 DMR regions at chromosome 11.**

| DMR      | CpG        | N            | Effect  | StdErr | Pvalue | Bonferroni | HetISq | Bp      |
|----------|------------|--------------|---------|--------|--------|------------|--------|---------|
| H19-DMR3 | cg22259242 | +++++----??  | -0.0002 | 0.0012 | 0.853  | No         | 0      | 2021243 |
| DMR2     | cg13165070 | ?????+++?+++ | 0.0015  | 0.0041 | 0.719  | No         | 0      | 2154113 |
| DMR2     | cg11717189 | ?????---?+-  | -0.0097 | 0.0059 | 0.099  | No         | 0      | 2154132 |
| DMR2     | cg07096953 | -+-----+++   | 0.0005  | 0.0033 | 0.872  | No         | 0      | 2154255 |
| DMR2     | cg02613624 | +++++-----+  | 0.0007  | 0.0022 | 0.758  | No         | 4.4    | 2154386 |
| DMR0     | cg00273464 | +++++-----   | 0.0001  | 0.0029 | 0.965  | No         | 0      | 2170412 |
| DMR0     | cg17665927 | +++++-----   | 0.0004  | 0.0034 | 0.910  | No         | 0      | 2170443 |

Effect: Regression coefficients

Bonferroni threshold = 7.14E-03

HetISq: Heterogeneity I<sup>2</sup> parameter

Enhancer & promoter annotations from Illumina 450k annotation
