# Supplementary material for: Genetically defined elevated homocysteine levels do not result in widespread changes of DNA methylation in leukocytes
Source: PubMed Central journal article supplement (PMC5662081; doi:10.1371/journal.pone.0182472), 2017-10-30
Supplement: pone.0182472.s016.pdf [file pone.0182472.s016.pdf]

## Members of the CHARGE Consortium

| NAME                             | EMAIL                                 | DEPARTMENT                                   | INSTITUTION/UNIVERSITY                                      | CITY        | COUNTRY     |
|----------------------------------|---------------------------------------|----------------------------------------------|-------------------------------------------------------------|-------------|-------------|
| Myriam Fornage<br>(Group Leader) | myriam.fornage@uth.tmc.edu            | Institute of Molecular Medicine              | The University of Texas<br>Health Science Center at Houston | Houston     | USA         |
| Abbas Dehghan                    | a.dehghan@imperial.ac.uk              | Department of Epidemiology and Biostatistics | Imperial College London                                     | London      | UK          |
| Adrienne Tin                     | atin1@jhu.edu                         | Department of Epidemiology                   | Johns Hopkins Bloomberg<br>School of Public Health          | Baltimore   | USA         |
| Alexander Teumer                 | ateumer@uni-greifswald.de             | Institute of Community Medicine              | University of Greifswald                                    | Greifswald  | Germany     |
| Ali Shojaie                      | ashojaie@uw.edu                       | Department of Biostatistics                  | University of Washington                                    | Seattle     | USA         |
| Allan Just                       | acjust@hsph.harvard.edu               | Department of Environmental Health           | Harvard T.H. Chan<br>School of Public Health                | Boston      | USA         |
| Andre Uitterlinden               | a.g.uitterlinden@erasmusmc.nl         | Department of Internal Medicine              | Erasmus University Medical Center                           | Rotterdam   | Netherlands |
| Anja Kretschmer                  | anja.kretschmer@helmholtz-muenchen.de | Institute of Epidemiology II                 | Helmholtz Zentrum München                                   | Munich      | Germany     |
| Anne Justice                     | justanne@email.unc.edu                | Department of Epidemiology                   | University of North Carolina                                | Chapel Hill | USA         |
| Audrey Chu                       | audrey.chu@nih.gov                    | Division of Intramural Research              | National Heart, Lung and Blood Institute                    | Bethesda    | USA         |
| Baccarelli, Andrea               | andrea.baccarelli@columbia.edu        | Environmental Health Sciences                | Columbia University                                         | New York    | USA         |
| Bertha Hidalgo                   | bhidalgo@uab.edu                      | Department of Epidemiology                   | UAB School of Public Health                                 | Birmingham  | USA         |
| Bonnie Joubert                   | bonnie.joubert@nih.gov                | Population Health Branch                     | National Institute of Environmental Health<br>Sciences      | Durham      | USA         |
| Brenton Swenson                  | brenton.swenson@gmail.com             | Cardiovascular Health Research Unit          | University of Washington                                    | Seattle     | USA         |

|                     |                                               |                                                              |                                                             |            |         |
|---------------------|-----------------------------------------------|--------------------------------------------------------------|-------------------------------------------------------------|------------|---------|
| Bressler, Jan       | Jan.Bressler@uth.tmc.edu                      | Epidemiology,<br>Human Genetics & Environmental Sciences     | The University of Texas Health Science Center<br>at Houston | Houston    | USA     |
| Brian Chen          | brian.chen@nih.gov                            | -                                                            | National Institute on Aging                                 | Bethesda   | USA     |
| Bruce Psaty         | psaty@u.washington.edu                        | Department of Biostatistics                                  | University of Washington                                    | Seattle    | USA     |
| Carola Marzi        | carola.marzi@helmholtz-muenchen.de            | Institute of Molecular Epidemiology                          | Helmholtz Zentrum München                                   | Munich     | Germany |
| Caroline Relton     | Caroline.Relton@bristol.ac.uk                 | School of Social and Community Medicine                      | University of Bristol                                       | Bristol    | UK      |
| Cathy Elks          | Cathy.Elks@mrc-epid.cam.ac.uk                 | MRC Epidemiology Unit                                        | University of Cambridge                                     | Cambridge  | UK      |
| Cavin Ward-Caviness | cavin.ward-caviness@helmholtz-<br>muenchen.de | Institute of Epidemiology II                                 | Helmholtz Zentrum München                                   | Munich     | Germany |
| christian gieger    | christian.gieger@helmholtz-muenchen.de        | Institute of Molecular Epidemiology                          | Helmholtz Zentrum München                                   | Munich     | Germany |
| Christian Herder    | Christian.Herder@DDZ.uni-duesseldorf.de       | Institute of Clinical Diabetology,<br>German Diabetes Center | Heinrich Heine University Düsseldorf                        | Düsseldorf | Germany |
| Chunyu Liu          | chunyu.liu@nih.gov                            | Division of Intramural Research                              | National Heart, Lung and Blood Institute                    | Bethesda   | USA     |
| Paul Courchesne     | courchesnepl@nhlbi.nih.gov                    | Division of Intramural Research                              | National Heart, Lung and Blood Institute                    | Bethesda   | USA     |
| Dana Hernandez      | hernand@mail.nih.gov                          | -                                                            | National Institute on Aging                                 | Bethesda   | USA     |
| David Melzer        | D.Melzer@exeter.ac.uk                         | Institute of Public Health                                   | University of Cambridge                                     | Cambridge  | UK      |
| David Siscovick     | dsiscovick@nyam.org                           | Institute for Urban Health                                   | The New York Academy of Medicine                            | New York   | USA     |
| Donna Arnett        | arnett@uab.edu                                | Department of Epidemiology                                   | UAB School of Public Health                                 | Birmingham | USA     |

|                     |                                   |                                                           |                                                    |             |         |
|---------------------|-----------------------------------|-----------------------------------------------------------|----------------------------------------------------|-------------|---------|
| Doug Kiel           | kiel@hsl.harvard.edu              | Musculoskeletal Research Center                           | Institute for Aging Research,<br>Hebrew SeniorLife | Boston      | USA     |
| Elena Carnero       | elena.carnero_montoro@kcl.ac.uk   | Division of Genetics and Molecular Medicine               | King's College London                              | London      | UK      |
| Elena Colicino      | ecolicin@hsph.harvard.edu         | Department of Environmental Health                        | Harvard T.H. Chan School of Public Health          | Boston      | USA     |
| Ellen Demerath      | ewd@umn.edu                       | Division of Epidemiology and Community Health             | University of Minnesota                            | Minneapolis | USA     |
| Eric Whitsel        | eric_whitsel@med.unc.edu          | Department of Epidemiology                                | University of North Carolina                       | Chapel Hill | USA     |
| Erin Ware           | ebakshis@umich.edu                | Survey Research Center,<br>Institute for Social Research  | University of Michigan                             | Ann Arbor   | USA     |
| Eva Reischl         | eva.reischl@helmholtz-muenchen.de | Institute of Molecular Epidemiology                       | Helmholtz Zentrum München                          | Munich      | Germany |
| Gail Davies         | gail.davies@ed.ac.uk              | School of Philosophy,<br>Psychology and Language Sciences | The University of Edinburgh                        | Edinburgh   | UK      |
| Golareh Agha        | gagha@hsph.harvard.edu            | Department of Environmental Health                        | Harvard T.H. Chan<br>School of Public Health       | Boston      | USA     |
| Megan L Grove-Gaona | Megan.L.Grove@uth.tmc.edu         | Human Genetic Center                                      | University of Texas Health Science Center          | Houston     | USA     |
| Gudny Eiriksdottir  | gudny@hjarta.is                   | Molecular Genetics Laboratory                             | Icelandic Heart Association                        | Kopavogur   | Iceland |
| Elizabeth Hibler    | elizabeth.a.hibler@vanderbilt.edu | Medicine                                                  | Vanderbilt University                              | Nashville   | USA     |
| Hortensia Moreno    | hortensiamor@gmail.com            | -                                                         | National Institute of Public Health                | Cuernavaca  | Mexico  |
| Hugo Aparicio       | Hugo.Aparicio@bmc.org             | University School of Medicine                             | Boston Medical Center                              | Boston      | USA     |
| Ian Deary           | ian.deary@ed.ac.uk                | School of Philosophy,<br>Psychology and Language Sciences | The University of Edinburgh                        | Edinburgh   | UK      |

|                   |                                 |                                                              |                                          |             |             |
|-------------------|---------------------------------|--------------------------------------------------------------|------------------------------------------|-------------|-------------|
| Ida Chen          | ichen@labiomed.org              | Department of Pediatrics                                     | Harbor-UCLA Medical Center               | Torrance    | USA         |
| Isabelle Romieu   | irromieu@gmail.com              | Environmental Health Department                              | National Institute of Public Health      | Cuernavaca  | Mexico      |
| Ivana Nedeljkovic | i.nedeljkovic@erasmusmc.nl      | Department of Epidemiology                                   | Erasmus University Medical Center        | Rotterdam   | Netherlands |
| James Floyd       | jfloyd@uw.edu                   | Cardiovascular Health Research Unit                          | University of Washington                 | Seattle     | USA         |
| Jari Lahti        | jari.lahti@helsinki.fi          | Helsinki Collegium for Advanced Studies                      | University of Helsinki                   | Helsinki    | Finland     |
| Jennifer Brody    | jeco@u.washington.edu           | Cardiovascular Health Research Unit                          | University of Washington                 | Seattle     | USA         |
| Jeff O'Connell    | joconnel@medicine.umaryland.edu | School of Medicine                                           | University of Maryland                   | Baltimore   | USA         |
| Jen Smith         | smjenn@umich.edu                | School of Public Health                                      | University of Michigan                   | Ann Arbor   | USA         |
| Jerry Rotter      | jrotter@labiomed.org            | Institute for Translational Genomics and Population Sciences | Harbor-UCLA Medical Center               | Torrance    | USA         |
| Jiantao Ma        | jjiantao.ma@nih.gov             | Division of Intramural Research                              | National Heart, Lung and Blood Institute | Bethesda    | USA         |
| Jim Pankow        | panko001@umn.edu                | Division of Epidemiology and Community Health                | University of Minnesota                  | Minneapolis | USA         |
| Joanne Murabito   | murabito@bu.edu                 | School of Medicine                                           | Boston University                        | Boston      | USA         |
| Jordana Bell      | jordana.bell@kcl.ac.uk          | Department of Twin Research & Genetic Epidemiology           | King's College London                    | London      | UK          |
| Jordi Jimenez     | jjimenez@imim.es                | The Spanish Stroke Genetics Consortium                       | GeneStroke                               | Barcelona   | Spain       |
| Joyce van meurs   | j.vanmeurs@erasmusmc.nl         | Department of Internal Medicine                              | Erasmus University Medical Center        | Rotterdam   | Netherlands |

|                         |                                         |                                                                                  |                                                        |               |             |
|-------------------------|-----------------------------------------|----------------------------------------------------------------------------------|--------------------------------------------------------|---------------|-------------|
| Juan castillo_fernandez | juan.castillo_fernandez@kcl.ac.uk       | Department of Twin Research & Genetic Epidemiology                               | King's College London                                  | London        | UK          |
| Karen Conneely          | kconnee@emory.edu                       | Department of Human Genetics                                                     | Emory University                                       | Atlanta       | USA         |
| Katharina Schramm       | katharina.schramm@helmholtz-muenchen.de | Institute of Genetic Epidemiology                                                | Helmholtz Zentrum München                              | Munich        | Germany     |
| Kathy Lunetta           | klunetta@bu.edu                         | School of Public Health                                                          | Boston University                                      | Boston        | USA         |
| Ken Ong                 | Ken.Ong@mrc-epid.cam.ac.uk              | MRC Epidemiology Unit                                                            | University of Cambridge<br>School of Clinical Medicine | Cambridge     | UK          |
| Kim Braun               | k.braun@erasmusmc.nl                    | Department of Epidemiology                                                       | Erasmus University Medical Center                      | Rotterdam     | Netherlands |
| Layal Chaker            | l.chaker@erasmusmc.nl                   | Department of Epidemiology                                                       | Erasmus University Medical Center                      | Rotterdam     | Netherlands |
| Lei Liu                 | lei.liu@northwestern.edu                | Feinberg School of Medicine                                                      | Northwestern University                                | Chicago       | USA         |
| Lekki Frazier-Wood      | LekkiWood@Gmail.com                     | Department of Biostatistics                                                      | University of Alabama                                  | Birmingham    | UK          |
| Daniel Levy             | levyd@nhlbi.nih.gov                     | Division of Intramural Research                                                  | National Heart, Lung and Blood Institute               | Bethesda      | USA         |
| Lifang Hou              | l-hou@northwestern.edu                  | Feinberg School of Medicine                                                      | Northwestern University                                | Chicago       | USA         |
| liliane pfeiffer        | liliane.pfeiffer@helmholtz-muenchen.de  | Institute of Molecular Epidemiology                                              | Helmholtz Zentrum München                              | Munich        | Germany     |
| Linda Broer             | l.broer@erasmusmc.nl                    | Department of Internal Medicine                                                  | Erasmus University Medical Center                      | Rotterdam     | Netherlands |
| Lindsay Reynolds        | lireynol@wakehealth.edu                 | Department of Epidemiology and Prevention,<br>Division of Public Health Sciences | Wake Forest School of Medicine                         | Winston-Salem | USA         |
| Liming Liang            | lliang@hsph.harvard.edu                 | Department of Epidemiology                                                       | Harvard T.H. Chan School of Public Health              | Boston        | USA         |

|                      |                                       |                                                              |                                                      |             |             |
|----------------------|---------------------------------------|--------------------------------------------------------------|------------------------------------------------------|-------------|-------------|
| Luke Pilling         | L.Pilling@exeter.ac.uk                | Epidemiology and Public Health group                         | Exeter Medical School                                | Exeter      | UK          |
| Marco Medici         | m.medici@erasmusmc.nl                 | Rotterdam Thyroid Center,<br>Department of Internal Medicine | Erasmus University Medical Center                    | Rotterdam   | Netherlands |
| Maria Argos          | argos@uic.edu                         | School of Public Health                                      | University of Illinois                               | Chicago     | USA         |
| Marilyn C Cornelis   | marilyn.cornelis@northwestern.edu     | Feinberg School of Medicine                                  | Northwestern University                              | Chicago     | USA         |
| Mark Omid Goodarzi   | mark.goodarzi@cshs.org                | Division of Endocrinology                                    | UCLA Clinical and<br>Translational Science Institute | Los Angeles | USA         |
| May Montasser        | mmontass@medicine.umaryland.edu       | School of Medicine                                           | University of Maryland                               | Baltimore   | USA         |
| Melanie Waldenberger | waldenberger@helmholtz-muenchen.de    | Institute of Molecular Epidemiology                          | Helmholtz Zentrum München                            | Munich      | Germany     |
| Michael Mendelson    | Michael.Mendelson@cardio.chboston.org | Department of Cardiology                                     | Boston Children's Hospital                           | Boston      | USA         |
| Mina Jhun            | minajhun@umich.edu                    | Department of Epidemiology                                   | University of Michigan<br>School of Public Health    | Ann Arbor   | USA         |
| Nancy Heard-Costa    | nheard@bu.edu                         | School of Medicine                                           | Boston University                                    | Boston      | USA         |
| Nona Sotoodehnia     | nsotoo@u.washington.edu               | Cardiovascular Health Research Unit                          | University of Washington                             | Seattle     | USA         |
| Kari North           | kari_north@unc.edu                    | Department of Epidemiology                                   | University of North Carolina                         | Chapel Hill | USA         |
| Olivera Jovanova     | o.jovanova@erasmusmc.nl               | Department of Epidemiology                                   | Erasmus University Medical Center                    | Rotterdam   | USA         |
| Pooja Mandaviya      | p.mandaviya@erasmusmc.nl              | Department of Internal Medicine                              | Erasmus University Medical Center                    | Rotterdam   | Netherlands |
| Paul Yousefi         | Paul.yousefi@bristol.ac.uk            | School of Social and Community Medicine                      | University of Bristol                                | Bristol     | UK          |

|                       |                                       |                                                                                                      |                                                          |             |             |
|-----------------------|---------------------------------------|------------------------------------------------------------------------------------------------------|----------------------------------------------------------|-------------|-------------|
| Pei-Chien Tsai        | pei-chien.tsai@kcl.ac.uk              | Twin Research Unit                                                                                   | King's College London                                    | London      | UK          |
| Rachel Hennein        | rachel.hennein@nih.gov                | Framingham Heart Study                                                                               | National Institutes of Health                            | Bethesda    | USA         |
| Rahul Gondalia        | rahgonda@unc.edu                      | Department of Epidemiology                                                                           | University of North Carolina                             | Chapel Hill | USA         |
| Rebecca Richmond      | Rebecca.richmond@bristol.ac.uk        | Integrative Epidemiology Unit,<br>School of Social and Community Medicine                            | University of Bristol                                    | Bristol     | UK          |
| Elosua Llanos         | Relosua@imim.es                       | Nutrition and Genomics Laboratory                                                                    | Tufts University                                         | Boston      | USA         |
| Riccardo Marioni      | Riccardo.Marioni@ed.ac.uk             | Centre for Genomic and Experimental Medicine,<br>MRC Institute of Genetics and Molecular<br>Medicine | University of Edinburgh                                  | Edinburgh   | UK          |
| Richard, Melissa A    | Melissa.A.Lee@uth.tmc.edu             | Health Science Center                                                                                | University of Texas                                      | Houston     | USA         |
| Roby Joehanes         | robypoehanes@hsl.harvard.edu          | Department of Medicine                                                                               | Institute for Aging Research,<br>Hebrew SeniorLife       | Boston      | USA         |
| Rozenn Lemaitre       | rozenl@u.washington.edu               | Department of Epidemiology                                                                           | University of Washington                                 | Seattle     | USA         |
| Ryan Irvin            | irvinr@uab.edu                        | Department of Epidemiology                                                                           | UAB School of Public Health                              | Birmingham  | USA         |
| S Ligthart            | s.ligthart@erasmusmc.nl               | Department of Epidemiology                                                                           | Erasmus University Medical Center                        | Rotterdam   | Netherlands |
| Sergi Sayols-Baixeras | ssayols@imim.es                       | Cardiovascular risk and nutrition                                                                    | Instituto Hospital del Mar de Investigaciones<br>Médicas | Barcelona   | Spain       |
| Sharon Kardia         | skardia@umich.edu                     | Public Health Genetics Program,<br>Life Sciences and Society Program                                 | University of Michigan                                   | Ann Arbor   | USA         |
| Sina Gharib           | sagharib@u.washington.edu             | Division of Pulmonary and Critical Care Medicine                                                     | University of Washington                                 | Seattle     | USA         |
| Sonja Zeilinger       | sonja.zeilinger@helmholtz-muenchen.de | Institute of Molecular Epidemiology                                                                  | Helmholtz Zentrum München                                | Munich      | Germany     |

|                   |                              |                                                             |                                                        |             |             |
|-------------------|------------------------------|-------------------------------------------------------------|--------------------------------------------------------|-------------|-------------|
| Marla Spires      | mspir2@uky.edu               | Dean's Office                                               | University of Kentucky<br>College of Public Health     | Lexington   | USA         |
| Stella Aslibekyan | saslibek@uab.edu             | Department of Epidemiology                                  | University of Alabama                                  | Birmingham  | UK          |
| Stephanie London  | london2@niehs.nih.gov        | Epidemiology Branch                                         | National Institute of Environmental Health<br>Sciences | Morrisville | USA         |
| Su, Shaoyong      | SSU@gru.edu                  | Georgia Prevention Institute,<br>Medical College of Georgia | Georgia Regents University                             | Augusta     | USA         |
| Sudha Seshadri    | suseshad@bu.edu              | Alzheimer's Disease Center                                  | Boston University                                      | Boston      | USA         |
| Tao Xu            | tao.xu@helmholtz-muenchen.de | Institute of Molecular Epidemiology                         | Helmholtz Zentrum München                              | Munich      | Germany     |
| Tianxiao Huan     | tianxiao.huan@nih.gov        | Division of Intramural Research                             | National Heart, Lung and Blood Institute               | Bethesda    | USA         |
| Tim Assimes       | tassimes@stanford.edu        | Department of Medicine - Cardiovascular<br>Medicine         | Stanford University                                    | Stanford    | USA         |
| Tim Spector       | tim.spector@kcl.ac.uk        | Department of Twin Research &<br>Genetic Epidemiology       | King's College London                                  | London      | UK          |
| Tiphaine Martin   | tiphaine.martin@kcl.ac.uk    | Department of Twin Research and<br>Genetic Epidemiology     | King's College London                                  | London      | UK          |
| Toshiko Tanaka    | tanakato@mail.nih.gov        | Longitudinal Studies Section                                | National Institute on Aging                            | Bethesda    | USA         |
| Trudy Voortman    | trudy.voortman@erasmusmc.nl  | Department of Epidemiology                                  | Erasmus University Medical Center                      | Rotterdam   | Netherlands |
| Wei Zhang         | weizhang.chicago@gmail.com   | Department of Pediatrics                                    | University of Illinois                                 | Chicago     | USA         |
| Wei Zhao          | zhaowei@umich.edu            | Department of Epidemiology                                  | University of Michigan                                 | Ann Arbor   | USA         |
| Weihua Guan       | wguan@umn.edu                | Division of Biostatistics                                   | University of Minnesota                                | Minneapolis | USA         |



|                |                                   |                                                        |                                                     |               |        |
|----------------|-----------------------------------|--------------------------------------------------------|-----------------------------------------------------|---------------|--------|
| Yi Hsang Hsu   | YiHsiangHsu@hsl.harvard.edu       | Gerontology Division                                   | Harvard Medical School                              | Boston        | USA    |
| Yinan Zheng    | YinanZheng2011@u.northwestern.edu | Institute for Public Health and Medicine               | Northwestern University Feinberg School of Medicine | Chicago       | USA    |
| Yongmei Liu    | yoliu@wakehealth.edu              | Department of Epidemiology & Prevention                | Wake Forest Baptist Medical Center                  | Winston-Salem | USA    |
| Yun Li         | yun_li@med.unc.edu                | Department of Biostatistics,<br>Department of Genetics | University of North Carolina                        | Chapel Hill   | USA    |
| Zdenka Pausova | zdenka.pausova@sickkids.ca        | Hospital for Sick Children                             | University of Toronto                               | Toronto       | Canada |
| Zenobia Moore  | ann.moore@nih.gov                 | Division of Lung Diseases                              | National Heart, Lung and Blood Institute            | Bethesda      | USA    |
